# Supplementary material
Source: PubMed Central journal article supplement (PMC7747375)
Supplement: 40820_2017_170_MOESM1_ESM.pdf [file 40820_2017_170_MOESM1_ESM.pdf]

Supporting Information for

**Novel Co<sub>3</sub>O<sub>4</sub> Nanoparticles/Nitrogen-Doped Carbon Composites with  
Extraordinary Catalytic Activity for Oxygen Evolution Reaction (OER)**

Xiaobing Yang<sup>1, 3, †</sup>, Juan Chen<sup>2, †</sup>, Yuqing Chen<sup>4</sup>, Pingjing Feng<sup>4</sup>, Huixian Lai<sup>4</sup>,  
Jintang Li<sup>4</sup>, Xuetao Luo<sup>4, \*</sup>

<sup>1</sup>College of Ecology and Resource Engineering, Wuyi University, Fujian Wuyishan, 354300, China.

<sup>2</sup>Fujian Key Laboratory of Advanced Materials, College of Materials, Xiamen University, Xiamen 361005, People's Republic of China

<sup>3</sup>Fujian Provincial Key Laboratory of Eco-Industrial Green Technology, Wuyi University, Fujian Wuyishan, 354300, People's Republic of China

<sup>4</sup>Department of Pharmacy, Zhongshan Hospital, Xiamen University, Xiamen 361004, People's Republic of China

<sup>†</sup>Yuqing Chen and Juan Chen contributed equally to this work.

\*Corresponding author. E-mail: xuetao@xmu.edu.cn

Tel: 86-0592-2188503

## Figures and Tables

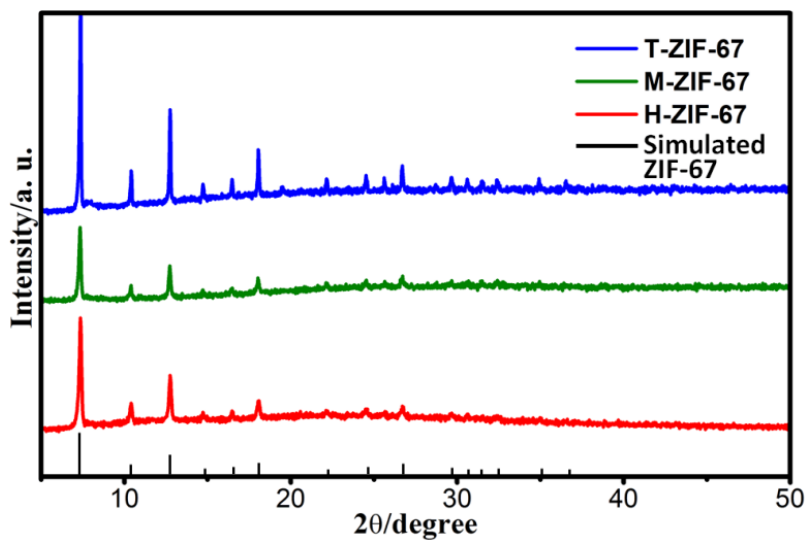

Fig. S1 PXRD patterns of M-ZIF-67, H-ZIF-67, and T-ZIF-67

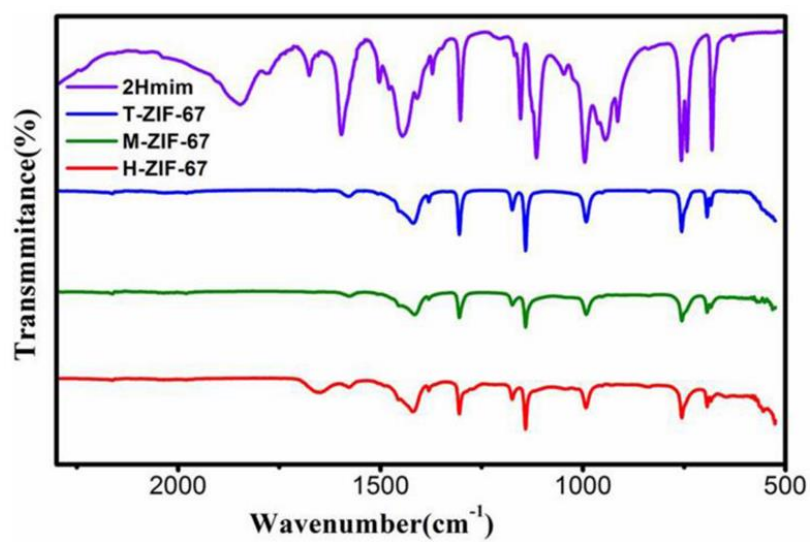

Fig. S2 FTIR spectrum of 2-Hmim, M-ZIF-67, H-ZIF-67, and T-ZIF-67

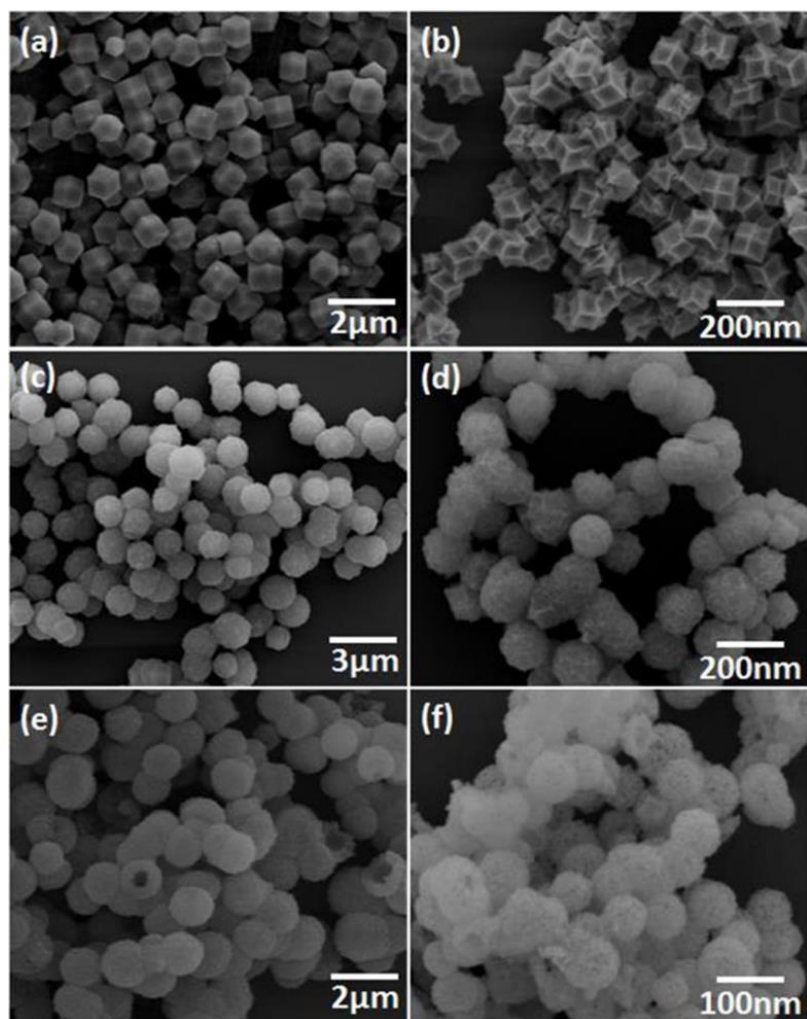

**Fig. S3** SEM images of **a** T-ZIF-67, **b** T-Co<sub>3</sub>O<sub>4</sub>/NPC, **c** M-ZIF-67, **d** M-Co<sub>3</sub>O<sub>4</sub>/NPC, **e** H-ZIF-67, and **f** H-Co<sub>3</sub>O<sub>4</sub>/NPC

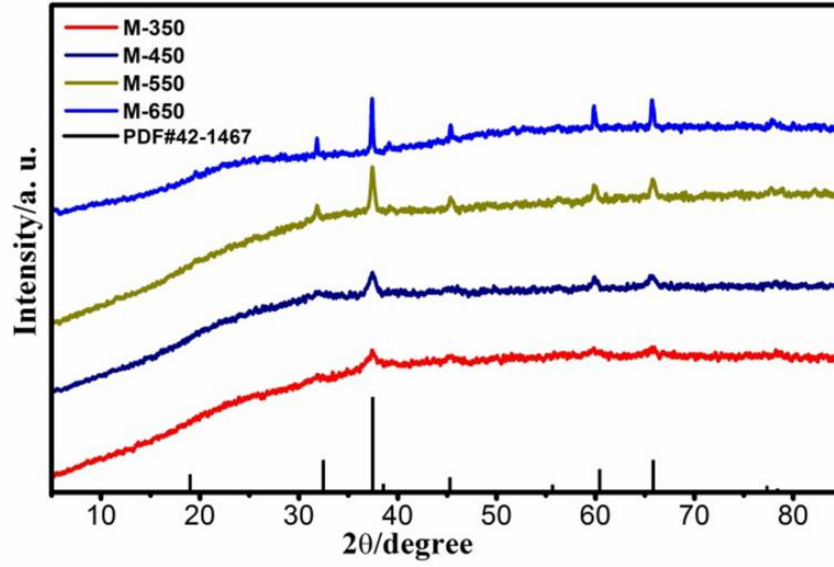

Fig. S4 powder XRD of M-350, M-450, M-550, and M-660

Table S1 elemental contents of  $\text{Co}_3\text{O}_4/\text{NPC}$  composites

|                                       | Co    | C     | N    | O     | Co/O |
|---------------------------------------|-------|-------|------|-------|------|
| T- $\text{Co}_3\text{O}_4/\text{NPC}$ | 62.43 | 11.41 | 0.56 | 25.60 | 2.44 |
| M- $\text{Co}_3\text{O}_4/\text{NPC}$ | 60.22 | 15.50 | 0.8  | 23.48 | 2.56 |
| H- $\text{Co}_3\text{O}_4/\text{NPC}$ | 54.16 | 22.33 | 1.25 | 22.29 | 2.43 |
